# Supplementary material for: Isolation and Characterization of Strain Exiguobacterium sp. KRL4, a Producer of Bioactive Secondary Metabolites from a Tibetan Glacier
Source: MDPI journal article supplement (doi:10.3390/microorganisms9050890), 2021-04-21
Supplement: s1 [file s1]

**Table S1.** Project information.

| <b>MIGS ID</b>   | <b>PROPERTY</b>            | <b>TERM</b>                    |
|------------------|----------------------------|--------------------------------|
| <b>MIGS 31</b>   | Finishing quality          | Improved-high-quality-draft    |
| <b>MIGS-28</b>   | Libraries used             | Illumina paired-end library    |
| <b>MIGS 29</b>   | Sequencing platforms       | Illumina MiSeq                 |
| <b>MIGS 31.2</b> | Fold coverage              | 114x                           |
| <b>MIGS 30</b>   | Assemblers                 | CLC Genomics workbench v 7.5.1 |
| <b>MIGS 32</b>   | Gene calling method        | RAST/PGAP                      |
|                  | Locus Tag                  | BLD48                          |
|                  | Genbank ID                 | MOLV000000000.1                |
|                  | GenBank Date of Release    | 07-Nov-2016                    |
|                  | GOLD ID                    | NOT REGISTERED                 |
|                  | BIOPROJECT                 | PRJNA350615                    |
| <b>MIGS 13</b>   | Source Material Identifier |                                |
|                  | Project relevance          | Pharmaceutical                 |

**Table S2.** Peaks list of FAMES from GC-MS analysis with relative abundance indicated.

| <i>Peak #</i> | <i>Start RT</i> | <i>End RT</i> | <i>Area</i>    | <i>%Area</i> |
|---------------|-----------------|---------------|----------------|--------------|
| 1             | 7.65            | 7.87          | 3.051.800.287  | 2.39         |
| 2             | 9.28            | 9.44          | 2.478.062.528  | 1.94         |
| 3             | 9.50            | 9.60          | 2.076.911.907  | 1.62         |
| 4             | 9.62            | 9.73          | 7.944.850.288  | 6.21         |
| 5             | 9.96            | 10.10         | 7.515.367.087  | 5.88         |
| 6             | 10.59           | 10.75         | 4.260.692.434  | 3.33         |
| 7             | 11.07           | 11.22         | 24.307.015.339 | 19.00        |
| 8             | 11.24           | 11.33         | 2.889.259.050  | 2.26         |
| 9             | 11.34           | 11.44         | 2.398.989.121  | 1.88         |
| 10            | 13.04           | 13.16         | 50.216.135.074 | 39.26        |
| 11            | 13.17           | 13.25         | 2.487.499.744  | 1.94         |
| 12            | 13.51           | 13.62         | 8.038.254.542  | 6.28         |
| 13            | 13.85           | 13.96         | 637.560.014    | 0.50         |
| 14            | 14.60           | 14.69         | 627.607.671    | 0.49         |
| 15            | 16.36           | 16.50         | 1.995.372.092  | 1.56         |
| 16            | 16.54           | 16.70         | 2.862.982.667  | 2.24         |
| 17            | 23.30           | 23.42         | 4.123.673.734  | 3.22         |

**Table S3.** Number of genes protein coding genes of *Exiguobacterium sp.* KRL4 associated with general COG functional categories.

| CODE     | VALUE | %AGE | DESCRIPTION                                                  |
|----------|-------|------|--------------------------------------------------------------|
| <b>J</b> | 150   | 4.6  | Translation, ribosomal structure and biogenesis              |
| <b>A</b> | 0     | 0    | RNA processing and modification                              |
| <b>K</b> | 162   | 5    | Transcription                                                |
| <b>L</b> | 162   | 5    | Replication, recombination and repair                        |
| <b>B</b> | 0     | 0    | Chromatin structure and dynamics                             |
| <b>D</b> | 23    | 0.7  | Cell cycle control, Cell division, chromosome partitioning   |
| <b>V</b> | 0     | 0    | Defense mechanisms                                           |
| <b>T</b> | 127   | 3.7  | Signal transduction mechanisms                               |
| <b>M</b> | 120   | 3.9  | Cell wall/membrane biogenesis                                |
| <b>N</b> | 58    | 1.8  | Cell motility                                                |
| <b>U</b> | 0     | 0    | Intracellular trafficking and secretion                      |
| <b>O</b> | 81    | 2.5  | Posttranslational modification, protein turnover, chaperones |
| <b>C</b> | 124   | 3.8  | Energy production and conversion                             |
| <b>G</b> | 162   | 5    | Carbohydrate transport and metabolism                        |
| <b>E</b> | 179   | 5.5  | Amino acid transport and metabolism                          |
| <b>F</b> | 71    | 2.2  | Nucleotide transport and metabolism                          |
| <b>H</b> | 78    | 2.4  | Coenzyme transport and metabolism                            |
| <b>I</b> | 84    | 2.6  | Lipid transport and metabolism                               |
| <b>P</b> | 117   | 3.6  | Inorganic ion transport and metabolism                       |
| <b>Q</b> | 26    | 0.8  | Secondary metabolites biosynthesis, transport and catabolism |
| <b>R</b> | 250   | 7.7  | General function prediction only                             |
| <b>S</b> | 165   | 5.1  | Function unknown                                             |
| <b>-</b> | 1008  | 31.8 | Not in COGs                                                  |

The total is based on the total number of protein coding genes in the genome.

**Table S4.** List of genes identified in the terpenes and siderophore pathways.

| <b>GENE</b>                       | <b>PUTATIVE<br/>FUNCTION</b>            |
|-----------------------------------|-----------------------------------------|
| <b>CLUSTER 1: TERPENE</b>         |                                         |
| <b>CTG1_41</b>                    | Class I SAM-dependent methyltransferase |
| <b>CTG1_42</b>                    | Phytoene desaturase                     |
| <b>CTG1_43</b>                    | Phytoene desaturase                     |
| <b>CTG1_44</b>                    | Phytoene synthase                       |
| <b>CTG1_45</b>                    | Phytoene desaturase                     |
| <b>CTG1_46</b>                    | Glycosyl transferase                    |
| <b>CTG1_47</b>                    | Glycerol acyltransferase                |
| <b>CTG1_52</b>                    | enol-CoA hydratase                      |
| <b>CTG1_54</b>                    | alpha glycosidase                       |
| <b>CLUSTER 2:<br/>TERPENE</b>     |                                         |
| <b>CTG1_1452</b>                  | Phytoene synthase                       |
| <b>CTG1_1453</b>                  | alpha-beta hydrolases                   |
| <b>CTG1_1455</b>                  | diguanylate cyclase                     |
| <b>CTG1_1460</b>                  | N-acetyltransferase                     |
| <b>CLUSTER 3:<br/>SIDEROPHORE</b> |                                         |
| <b>CTG1_1637</b>                  | iucA/iucC siderophore synthesis         |
| <b>CTG1_1638</b>                  | iucA/iucC siderophore synthesis         |
| <b>CTG1_1639</b>                  | acyl-CoA synthase                       |
| <b>CTG1_1640</b>                  | putative acyl carrier protein           |
| <b>CTG1_1643</b>                  | glycerol dehydrogenase                  |

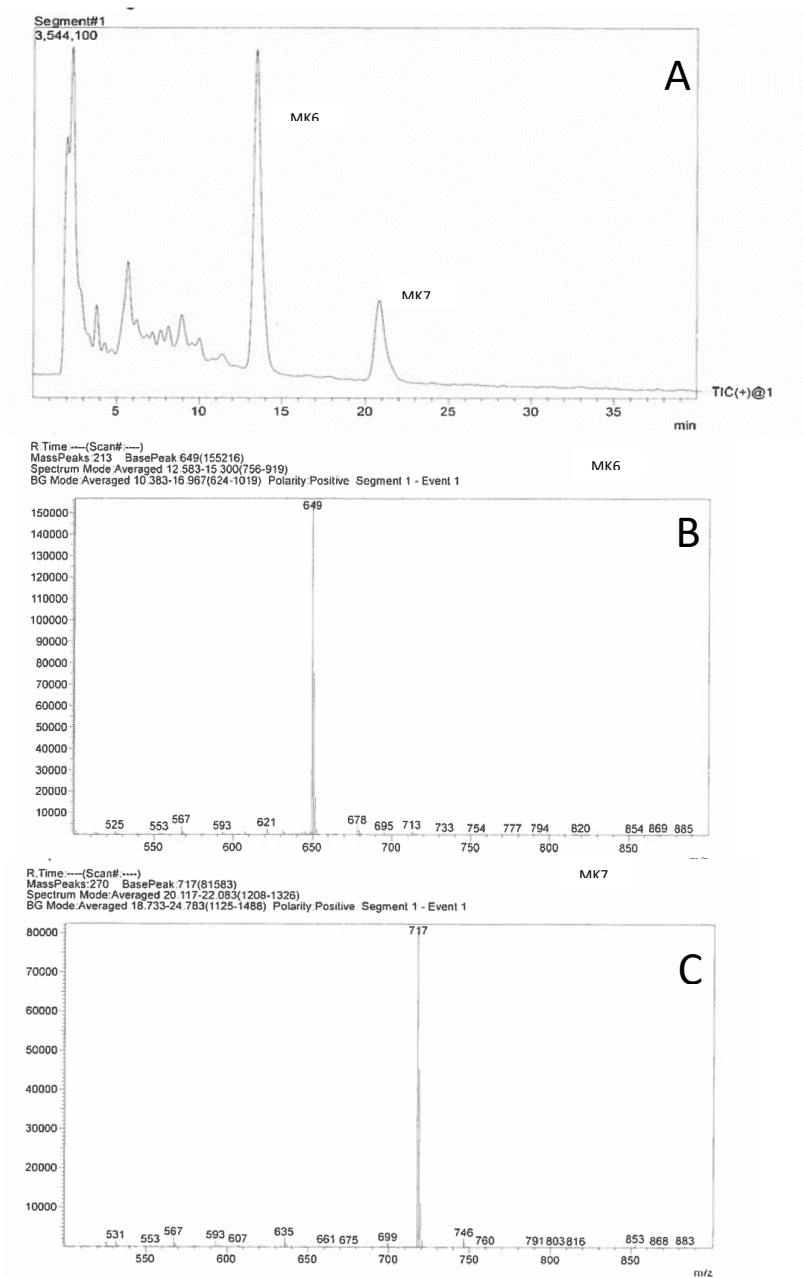

**Figure S1.** LC-MS analysis of quinones. A) Chromatogram of extracted quinones analysed on a reverse-phase RP-18 Lichrospher column eluted with n-hexane/ethylacetate (99:1, by vol.) with a flow rate of 1.0 mL min<sup>-1</sup>. Identification by ESI/MS of quinone MK6 (B) and quinone MK7 (C).

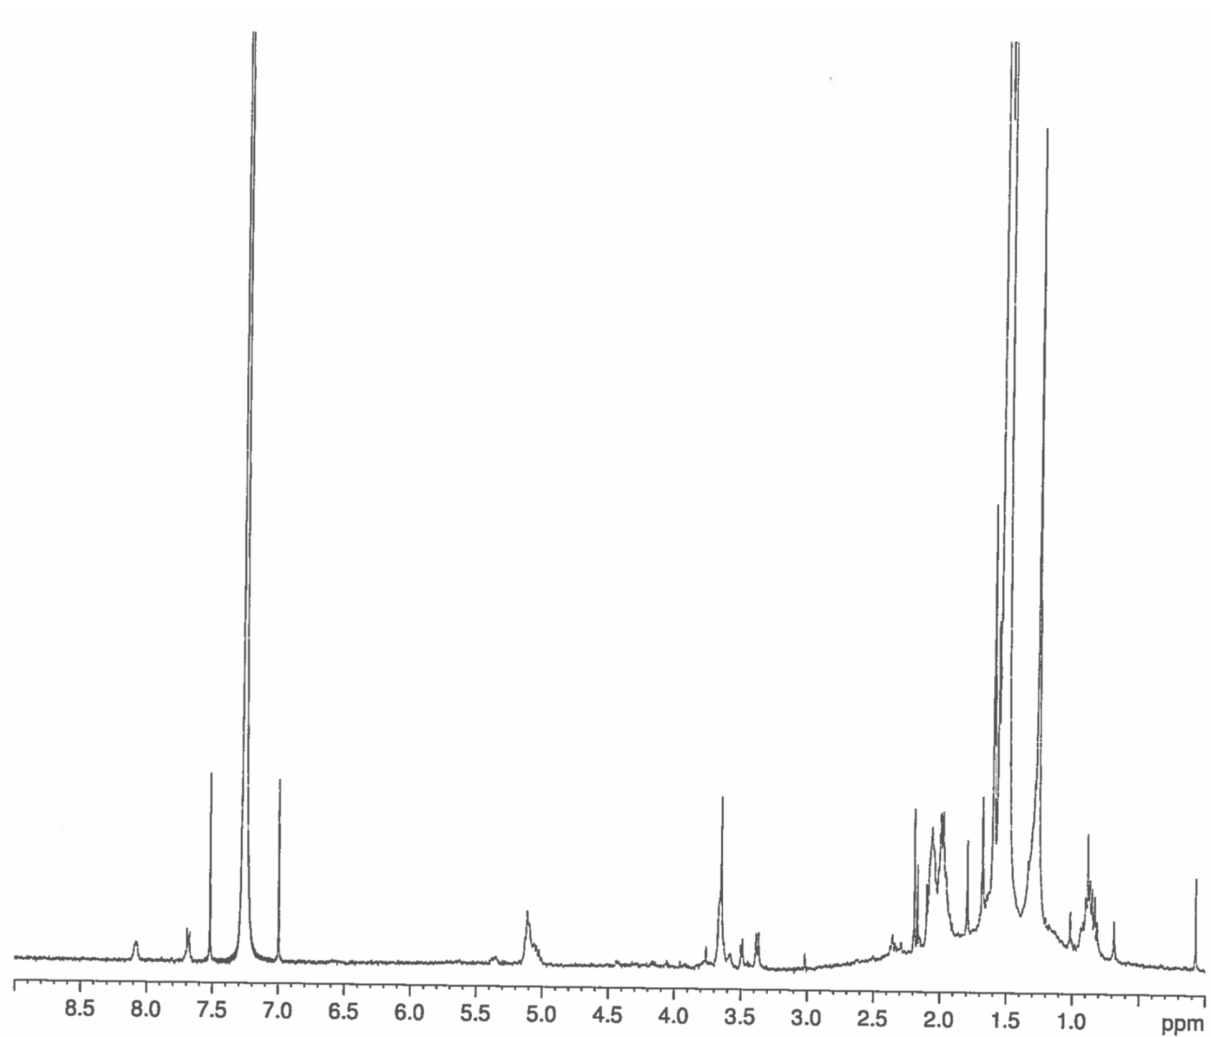

**Figure S2.**  $^1\text{H}$ -NMR spectrum of extracted quinones.

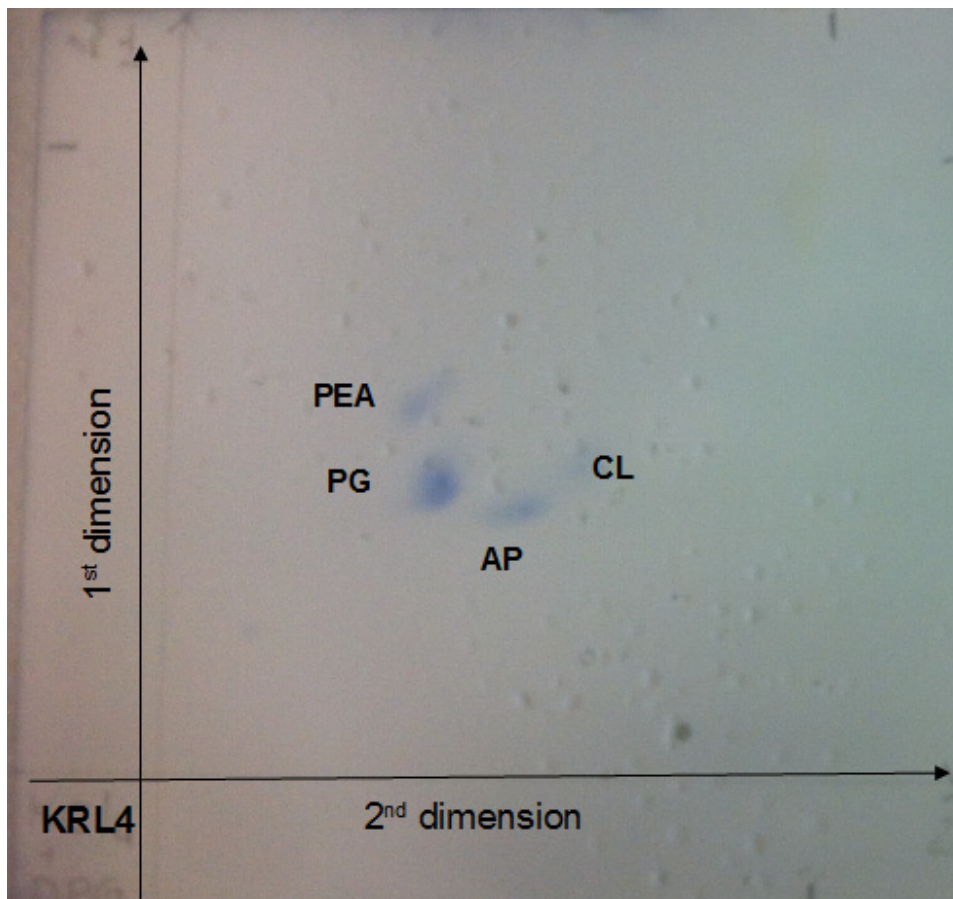

**Figure S3.** Bi-dimensional Thin Layer Chromatography (TLC) showing the phospholipids of strain KRL4. First dimension:  $\text{CHCl}_3/\text{MeOH}/\text{H}_2\text{O}$  (65:25:4, by vol.); second dimension:  $\text{CHCl}_3/\text{MeOH}/\text{Acetic acid}/\text{H}_2\text{O}$  (80:12:15:4, by vol.). Phospholipids were detected by spraying TLC with the Dittmer- Lester reagent. 1,2 diacylglycerol-3-phosphorylethanolamine (PEA), 1,2 dipalmitoyl-3-glycerol-phosphatidic acid (AP), 1-(3-sn-phosphatidyl)-sn-glycerol disodium salt (PG), 1,3-di(3-sn-phosphatidyl)-sn-glycerol disodium salt (cardiolipin, CL).

RT: 7.51 - 15.31

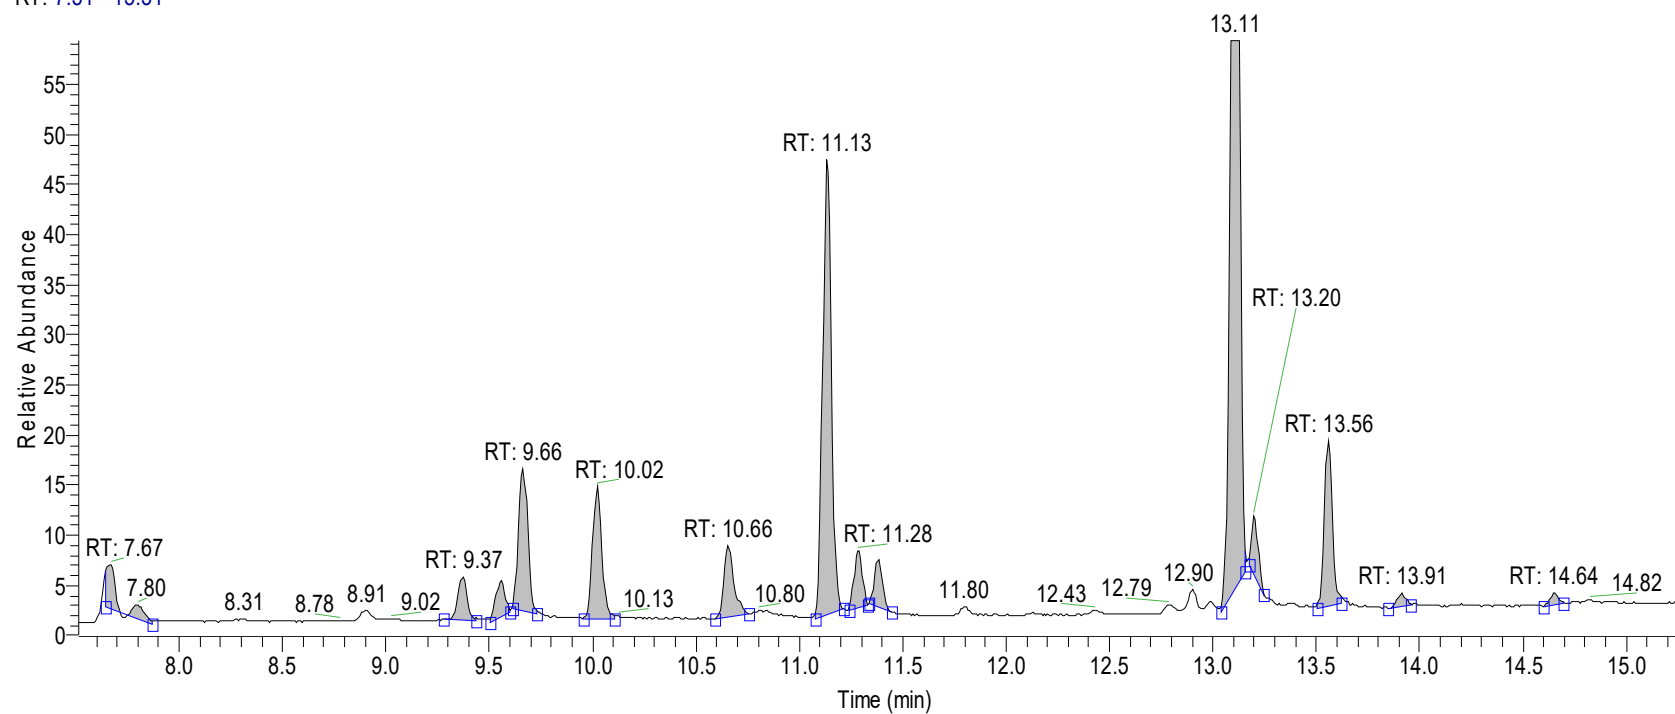

**Figure S4.** Total Ion Chromatogram of FAMES obtained by GC-MS analysis.

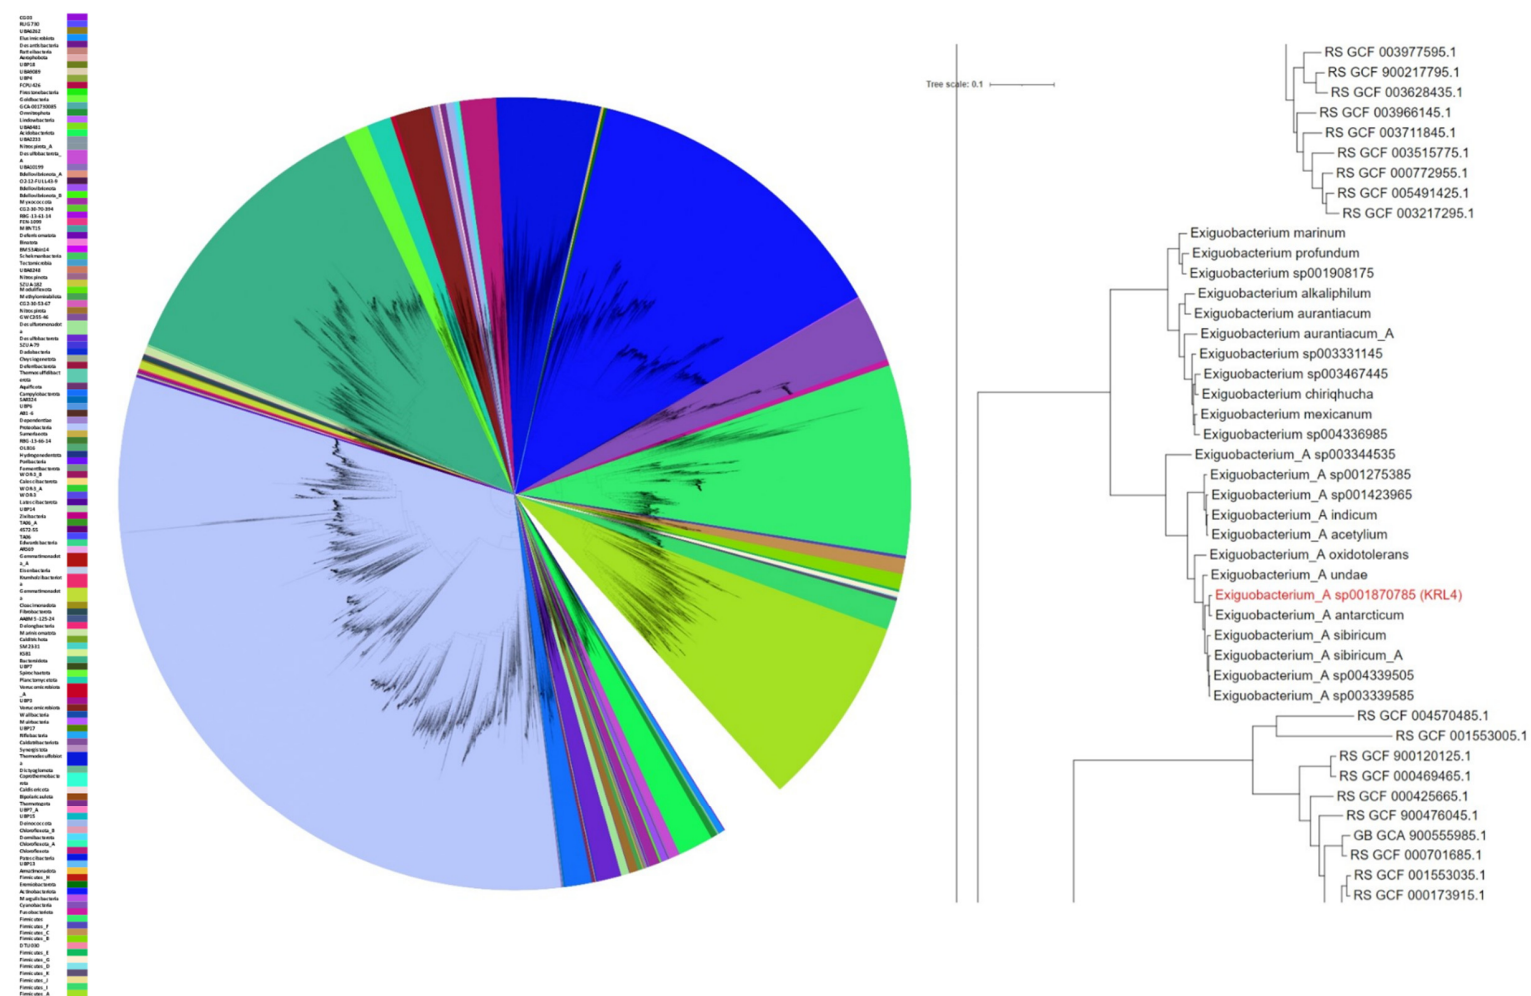

**Figure S5.** Whole genome-based classification of strain KRL4 according to the GTDB bacterial phylogeny
